# Supplementary material for: Glutamatergic neurometabolite levels in the caudate are associated with the ability of rhythm production
Source: Frontiers journal article supplement (doi:10.3389/fnins.2023.1196805), 2023-08-04

**Supplementary Table1. Relaxation times and relative water tissue content values**

| compartment | Water concentration<br>(mmol H2O / kg tissue) | T1 (ms) | T2 (ms) |
|-------------|-----------------------------------------------|---------|---------|
| CSF         | 55556                                         | 4000    | 2000    |
| GM          | 43300                                         | 1200    | 100     |
| WM          | 35880                                         | 800     | 80      |

**Supplementary Table2. Spectrum qualities and tissue heterogeneity values**

|            | Caudate (mean ± SD) | dACC (mean ± SD) |
|------------|---------------------|------------------|
| FWHM (Hz)  | 0.063±0.008         | 0.037±0.005      |
| SNR        | 15.364±2.150        | 23.852±4.148     |
| %SD Glx    | 8.364±1.965         | 5.185±0.786      |
| GM/(GM+WM) | 35.458±5.616        | 74.237±3.742     |
| GM ratio   | 0.286±0.045         | 0.532±0.032      |
| WM ratio   | 0.524±0.076         | 0.186±0.035      |
| CSF ratio  | 0.190±0.076         | 0.282±0.047      |

**Supplementary Figure 1:** The flowchart showing the reasons for exclusion from the analyses

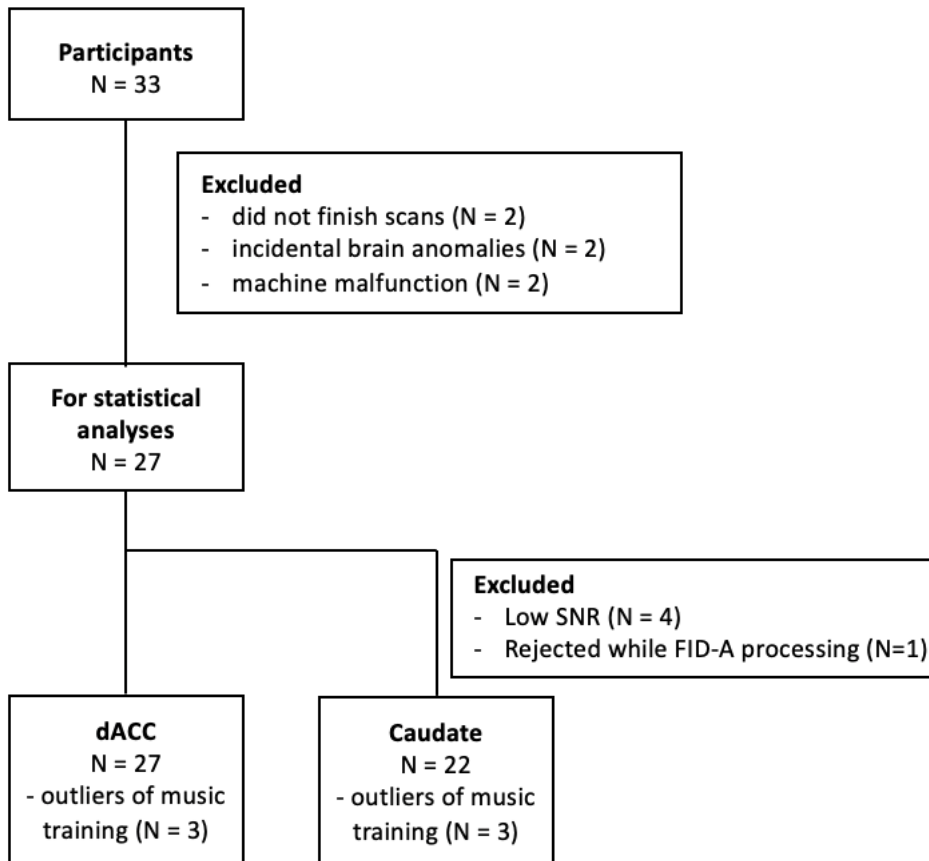

Supplement: Data_Sheet_1.pdf [file Data_Sheet_1.pdf]
